# Supplementary material for: Abnormal Cognition, Sleep, EEG and Brain Metabolism in a Novel Knock-In Alzheimer Mouse, PLB1
Source: PLOS journal article supplement (doi:10.1371/journal.pone.0027068), 2011-11-11

WT, 14m

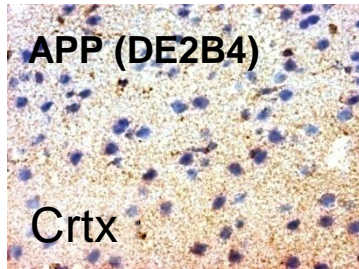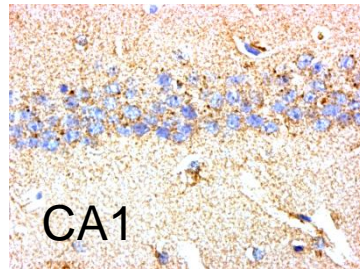

APP/PS1, 12 m

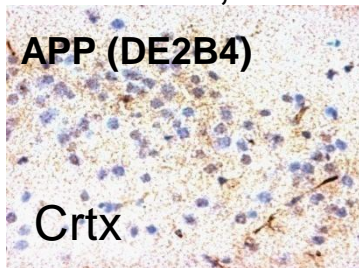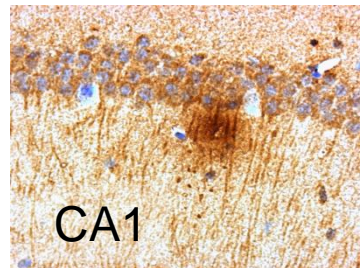

WT, 14m

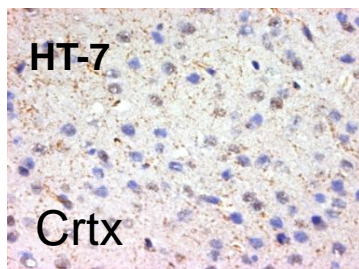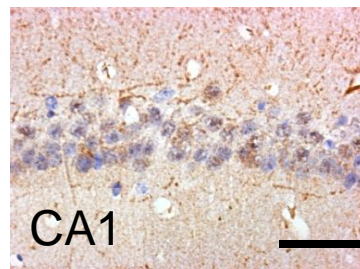

Supplement: S3 (10.1371/journal.pone.0027068.s003) [file journal.pone.0027068.s003]
